# Supplementary material for: Genome-Wide Sequence Characterization and Expression Analysis of Major Intrinsic Proteins in Soybean (Glycine max L.)
Source: PubMed Central journal article supplement (PMC3577755; doi:10.1371/journal.pone.0056312), 2013-02-20

Ka/Ks annotated evolutionary tree

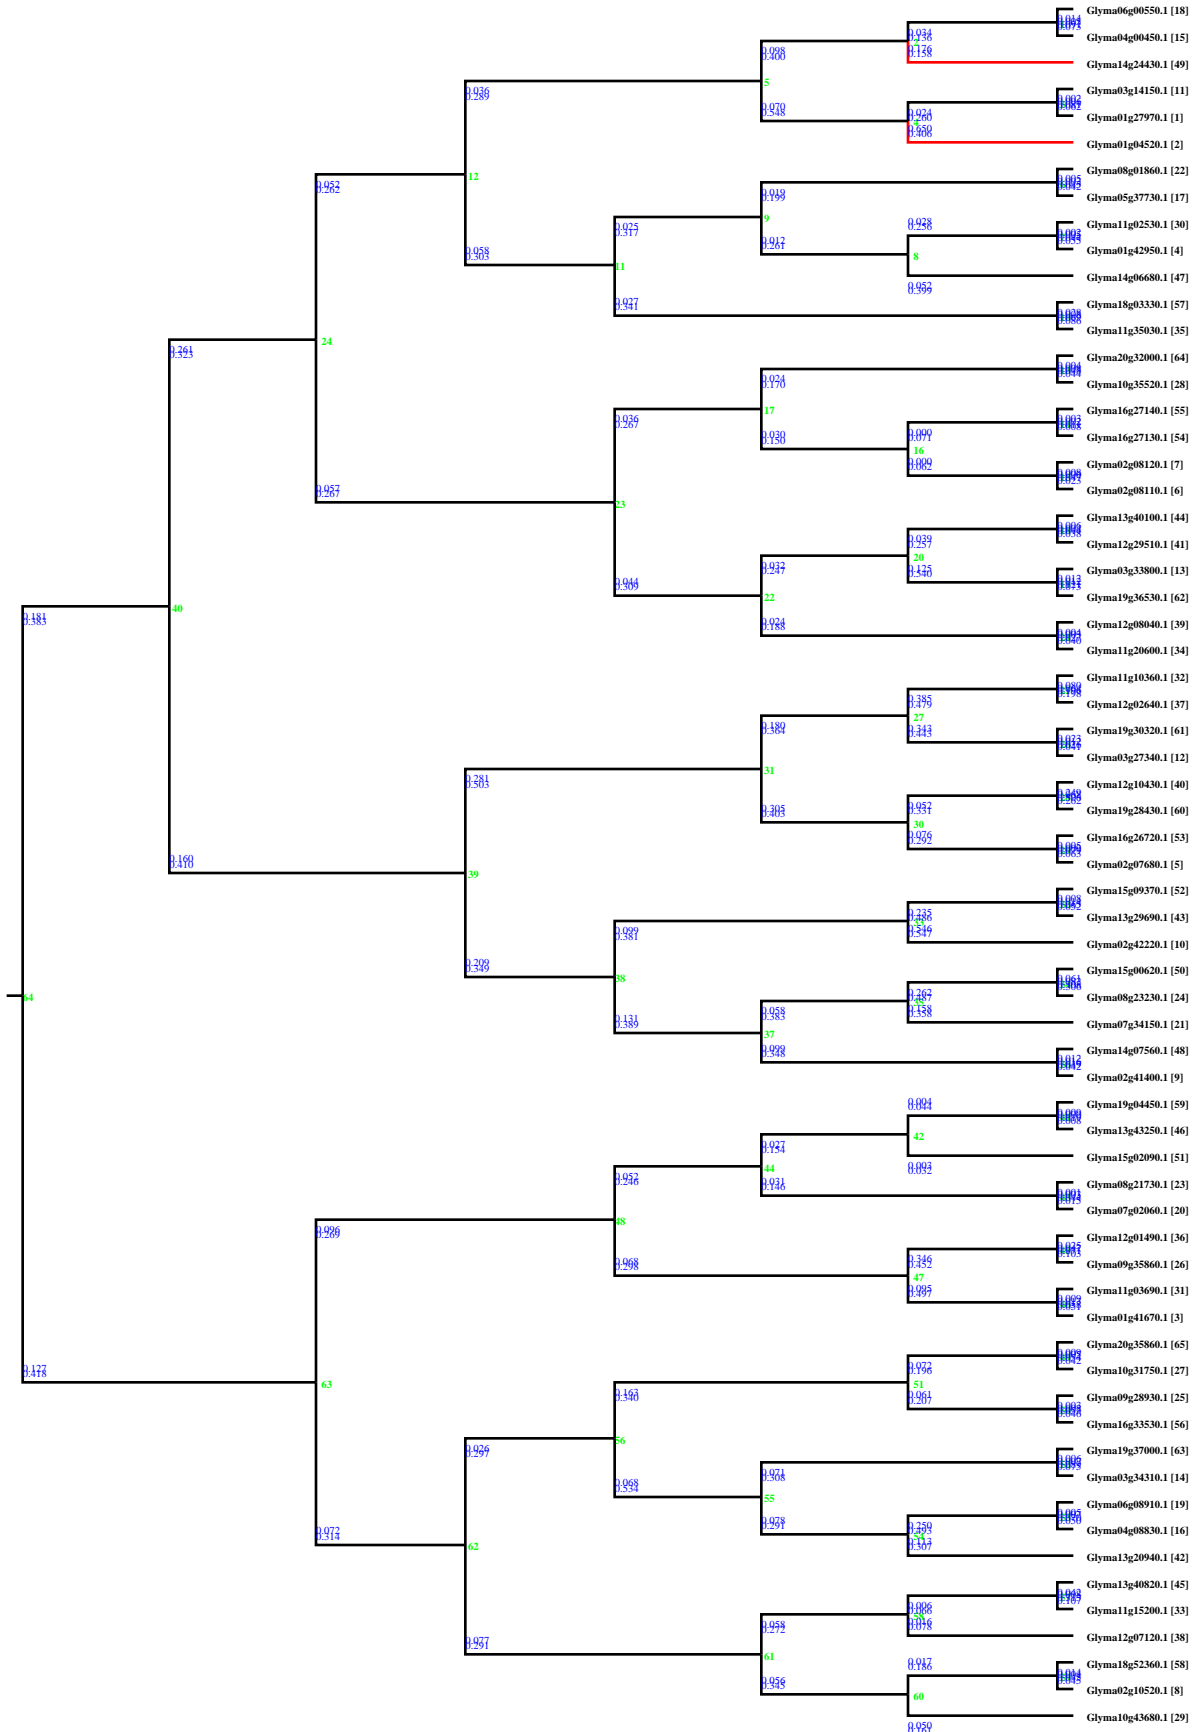

Supplement: pone.0056312.s005.pdf [file pone.0056312.s005.pdf]
